# Supplementary material for: The accessory Sec system (SecY2A2) in Streptococcus pneumoniae is involved in export of pneumolysin toxin, adhesion and biofilm formation
Source: PubMed Central journal article supplement (PMC5526788; doi:10.1016/j.micinf.2017.04.003), 2017
Supplement: mmc1.pdf [file mmc1.pdf]

## Supplementary data

Table S1. Bacteria and plasmids

| Strain or plasmid                           | Relevant characteristics                                                                                                                                     | Source           |
|---------------------------------------------|--------------------------------------------------------------------------------------------------------------------------------------------------------------|------------------|
| TIGR4                                       | Wild type (serotype 4)                                                                                                                                       | Laboratory stock |
| UB2312                                      | $\Delta psrP::ermAM$ (Em <sup>R</sup> )                                                                                                                      | T. J. Mitchell   |
| UB2570                                      | $\Delta secA2::aad9$ (Sp <sup>R</sup> )                                                                                                                      | This study       |
| UB2706                                      | $\Delta ply::cat$ (Cm <sup>R</sup> )                                                                                                                         | This study       |
| UB2707                                      | $\Delta secA2\Delta ply$ (Sp <sup>R</sup> , Cm <sup>R</sup> )                                                                                                | This study       |
| UB2717                                      | $\Delta ply/pMSPply^+$ (Cm <sup>R</sup> , Em <sup>R</sup> )                                                                                                  | This study       |
| UB2719                                      | $\Delta secA2\Delta ply/pMSPply^+$ (Sp <sup>R</sup> , Cm <sup>R</sup> , Em <sup>R</sup> )                                                                    | This study       |
| UB2768                                      | $\Delta ply/pMSPply_{63}^+$ (Cm <sup>R</sup> , Em <sup>R</sup> )                                                                                             | This study       |
| UB2769                                      | $\Delta secA2\Delta ply/pMSPply_{63}^+$ (Sp <sup>R</sup> , Cm <sup>R</sup> , Em <sup>R</sup> )                                                               | This study       |
| pGEM <sup>®</sup> -T                        | PCR product cloning vector (Ap <sup>R</sup> )                                                                                                                | Promega          |
| pGEM <sup>®</sup> -<br>$\Delta secA2::aad9$ | Contains <i>aad9</i> (with promoter and terminator) inserted between <i>asp3</i> up and <i>gtfA</i> down flanking regions of <i>secA2</i> (Sp <sup>R</sup> ) | This study       |
| pGEM <sup>®</sup> -<br>$\Delta ply::cat$    | Contains <i>cat</i> (with promoter) inserted between SP_1924 up and SP_1922 down flanking regions of <i>ply</i> (SP_1923) (Ap <sup>R</sup> )                 | This study       |
| pFW5                                        | 2.8 kb carrying <i>aad9</i> (Sp <sup>R</sup> )                                                                                                               | A. Podbielski    |
| pR326                                       | 3.99 kb <i>bla</i> , <i>cat</i> (Ap <sup>R</sup> Cm <sup>R</sup> )                                                                                           | J-P. Claverys    |
| pMSP7515                                    | 12.63 kb <i>prgB</i> , <i>ermAM</i> , <i>nisR</i> , <i>nisK PnisA</i> (Em <sup>R</sup> ) nisin-inducible <i>prgB</i>                                         | G.M. Dunny       |
| pMSPply<br>(denoted <i>pply</i> )           | 9.8 kb <i>ermAM</i> , <i>nisR</i> , <i>nisK PnisA ply</i> (Em <sup>R</sup> ) nisin-inducible <i>ply</i>                                                      | This study       |
| pMSPply63<br>(denoted <i>pply63</i> )       | 9.8 kb <i>ermAM</i> , <i>nisR</i> , <i>nisK PnisA ply63</i> (Em <sup>R</sup> ) nisin-inducible <i>ply</i> (Ply:Thr <sub>63</sub> Ala)                        | This study       |

**Table S2.** Primers used in this study

| Name                   | Primer sequence 5'---->3' <sup>a,b</sup>                    | Target                   |
|------------------------|-------------------------------------------------------------|--------------------------|
| MBF7                   | CCTCAGCTTCCCTTATTA                                          | <i>asp3-secA2</i>        |
| MBR7                   | <b>CAATCACCTGCTT</b> <u>CGGATCCCCTTCCCCCGTATTCATCTC</u>     | <i>asp3-secA2</i>        |
| MBF8                   | <b>AATACGGGGGAAGGG</b> <u>GATCCGAAGCAGGTGATTGATAA</u><br>AG | <i>secA2-gtfA</i>        |
| MBR8                   | ATCCACTGTCACGCTAGTAG                                        | <i>secA2-gtfA</i>        |
| BamSpecF               | CGCGGATCCGATCATATCATATATAATCTAGAAT                          | <i>aad9</i>              |
| BamSpecR               | GCGGGATCCGCCCATGGCGCGCTTACCAATTAGA                          | <i>aad9</i>              |
| Up.PlyF                | GAGAGGAGATGTTGTAGCTC                                        | SP_1924- <i>ply</i>      |
| Up.PlyR                | <b>GTCCCAAGCC</b> <u>GGATCCAGAGGCGACTGTCGTTGGTAGC</u>       | SP_1924- <i>ply</i>      |
| Down.PlyF              | <b>GACAGTCGCCTCT</b> <u>GGATCCGGCTTGGGACAGAAATGGG</u><br>C  | <i>ply-SP_1922</i>       |
| Down.PlyR              | CAAACCTAGACCATTATCTGC                                       | <i>ply-SP_1922</i>       |
| BamCatF2               | CGCGGATCCGTTCAACAAACGAAAATTGGATAAAGT                        | <i>cat</i>               |
| BamCatR                | GCGGGATCCGGAGAAGTCGGTTCAGAAAAAG                             | <i>cat</i>               |
| NcoIPlyF               | CGCCCATGG <b>AGGAGG</b> ATGATACATGGCAAATAAAGCAG<br>TAAATGAC | <i>ply</i>               |
| XhoIPlyR               | GCGCTCGAGTTACTAGTCATTTTCTACCTTATCTTC                        | <i>ply</i>               |
| PlyMutA.F <sup>c</sup> | <b>GCCGCTACCAACGACAGTCGCCTCTATCCT</b>                       | <i>ply</i> <sub>63</sub> |
| PlyMutA.R <sup>c</sup> | TACAGAAATATCACTTGTATTTGTCGAC                                | <i>ply</i> <sub>63</sub> |

<sup>a</sup> Restriction sites are underlined.

<sup>b</sup> Sequence overhangs are in bold.

<sup>c</sup> 5' end phosphate modification.

**Table S3.** Top 100 hits of proteins identified in *S. pneumoniae* TIGR4 versus  $\Delta secA2$  mutant (shaded grey) cell wall protein extracts. TIGR4 peptides are sorted highest to lowest number of unique peptide sequences.

| Acc. <sup>a</sup> | pI <sup>b</sup> | Description                                              | % Coverage <sup>c</sup> |                | PSM <sup>d</sup> |                | Peptides <sup>e</sup> |                |
|-------------------|-----------------|----------------------------------------------------------|-------------------------|----------------|------------------|----------------|-----------------------|----------------|
|                   |                 |                                                          | WT                      | $\Delta secA2$ | WT               | $\Delta secA2$ | WT                    | $\Delta secA2$ |
| I6L8R4            | 6.13            | $\beta$ -galactosidase                                   | 62.52                   | 44.33          | 321              | 128            | 111                   | 71             |
| Q97RY6            | 6.34            | Serine protease                                          | 54.72                   | 36.21          | 210              | 95             | 92                    | 61             |
| Q2MGH6            | 6.07            | Endo- $\alpha$ -N-acetylgalactosaminidase                | 63.95                   | 2.21           | 273              | 2              | 90                    | 2              |
| Q97NQ8            | 7.03            | DNA-directed RNA polymerase subunit $\beta$              | 57.96                   | 53.39          | 179              | 129            | 64                    | 61             |
| Q97RK7            | 4.93            | Aminopeptidase N                                         | 77.48                   | 84.55          | 291              | 246            | 59                    | 65             |
| Q97QP7            | 5.38            | Immunoglobulin A1 protease                               | 42.37                   | 35.68          | 102              | 70             | 56                    | 45             |
| Q97NQ7            | 5.14            | DNA-directed RNA polymerase subunit $\beta$              | 55.11                   | 46.30          | 159              | 114            | 52                    | 47             |
| P64022            | 4.96            | Elongation factor G                                      | 86.29                   | 89.47          | 429              | 353            | 51                    | 59             |
| Q97NK0            | 6.61            | Alcohol dehydrogenase                                    | 70.55                   | 71.46          | 237              | 211            | 51                    | 55             |
| P95829            | 4.77            | Chaperone protein DnaK                                   | 88.80                   | 89.29          | 454              | 335            | 49                    | 54             |
| Q97SC6            | 5.25            | Formate acetyltransferase                                | 77.13                   | 78.04          | 203              | 135            | 48                    | 47             |
| P29849            | 5.17            | Maltodextrin phosphorylase                               | 65.03                   | 62.90          | 172              | 125            | 42                    | 41             |
| Q9L7Q2            | 5.25            | Zinc metalloprotease zmpB                                | 31.16                   | 33.16          | 88               | 93             | 42                    | 44             |
| Q97SK0            | 5.08            | Putative ATP-dependent Clp protease, ATP-binding subunit | 69.90                   | 74.18          | 155              | 125            | 41                    | 48             |
| P67580            | 4.98            | Methionine-tRNA ligase                                   | 62.86                   | 62.41          | 117              | 85             | 40                    | 39             |
| Q97QM4            | 5.48            | Ribonucleoside-diphosphate reductase                     | 63.42                   | 55.35          | 101              | 58             | 40                    | 31             |
| Q54869            | 5.15            | Arginine-tRNA ligase                                     | 74.42                   | 74.07          | 116              | 84             | 39                    | 36             |
| Q54970            | 5.17            | Pyruvate oxidase                                         | 71.40                   | 73.43          | 361              | 293            | 39                    | 46             |
| Q97S90            | 5.31            | Putative endo- $\beta$ -N-acetylglucosaminidase          | 33.33                   | 3.92           | 76               | 3              | 39                    | 3              |
| Q97Q48            | 5.15            | Alanine-tRNA ligase                                      | 52.87                   | 40.25          | 83               | 55             | 38                    | 30             |
| Q97S45            | 5.17            | Valine-tRNA ligase                                       | 50.74                   | 48.24          | 102              | 77             | 38                    | 35             |
| Q97RC5            | 5.15            | Pyruvate kinase                                          | 77.64                   | 72.65          | 279              | 207            | 37                    | 37             |
| Q97PH0            | 4.83            | Endopeptidase O                                          | 68.10                   | 67.46          | 154              | 133            | 37                    | 42             |
| Q97S57            | 8.84            | Translation initiation factor IF-2                       | 51.36                   | 47.29          | 73               | 53             | 37                    | 34             |
| P64030            | 4.97            | Elongation factor Tu                                     | 90.45                   | 86.18          | 631              | 467            | 36                    | 35             |
| Q97SQ7            | 5.69            | Putative alkaline amylopullulanase                       | 40.47                   | 22.50          | 64               | 22             | 36                    | 18             |
| Q97PD6            | 5.55            | Protein translocase subunit SecA 1                       | 52.81                   | 46.12          | 88               | 46             | 35                    | 29             |
| P0CB61            | 5.00            | Isoleucine-tRNA ligase                                   | 45.27                   | 35.27          | 93               | 53             | 35                    | 25             |
| P0A335            | 4.84            | 60 kDa chaperonin                                        | 60.74                   | 66.30          | 162              | 131            | 32                    | 38             |
| Q97PU5            | 4.82            | Phosphoglucomutase                                       | 74.48                   | 88.81          | 105              | 106            | 31                    | 35             |
| Q97SQ9            | 5.15            | Glucosamine-fructose-6-phosphate aminotransferase        | 67.61                   | 83.72          | 103              | 156            | 31                    | 42             |
| Q97SR1            | 5.07            | Proline-tRNA ligase                                      | 57.37                   | 63.53          | 67               | 67             | 31                    | 31             |

|        |      |                                                            |       |       |     |     |    |    |
|--------|------|------------------------------------------------------------|-------|-------|-----|-----|----|----|
| Q97QS2 | 4.81 | Enolase                                                    | 85.71 | 91.94 | 481 | 466 | 30 | 37 |
| P22976 | 5.22 | Probable transketolase                                     | 75.99 | 76.44 | 123 | 117 | 30 | 33 |
| Q97RF9 | 5.14 | Ribosomal protein S1                                       | 68.75 | 69.25 | 155 | 121 | 30 | 31 |
| P65887 | 5.69 | Adenylosuccinate synthetase                                | 66.36 | 66.82 | 89  | 84  | 30 | 30 |
| Q97RC8 | 5.53 | Xaa-Pro dipeptidyl-peptidase                               | 45.57 | 44.65 | 57  | 52  | 30 | 29 |
| Q97S89 | 4.98 | Phosphoglycerate kinase                                    | 88.69 | 90.95 | 481 | 437 | 29 | 37 |
| Q97QM7 | 4.72 | Phosphoenolpyruvate-protein phosphotransferase             | 67.94 | 69.15 | 168 | 109 | 29 | 32 |
| P64297 | 5.08 | GMP synthase [glutamine-hydrolyzing]                       | 65.58 | 69.23 | 93  | 85  | 29 | 28 |
| Q97SJ2 | 5.50 | Capsular polysaccharide biosynthesis protein Cps4K         | 66.99 | 65.04 | 71  | 63  | 29 | 28 |
| Q97NA4 | 5.08 | Arginine deiminase                                         | 60.39 | 46.45 | 125 | 32  | 29 | 16 |
| Q97SS0 | 5.02 | Leucine-tRNA ligase                                        | 42.74 | 51.86 | 70  | 50  | 29 | 26 |
| Q97QE4 | 4.89 | Carbamoyl-phosphate synthase large chain                   | 39.22 | 30.15 | 58  | 42  | 29 | 25 |
| Q97T93 | 5.36 | Adenylosuccinate lyase                                     | 70.14 | 68.98 | 70  | 54  | 28 | 24 |
| Q97PW6 | 5.00 | Glycine-tRNA ligase $\beta$ subunit                        | 42.77 | 32.45 | 53  | 31  | 28 | 18 |
| Q97SP5 | 5.21 | Aminopeptidase C                                           | 61.04 | 67.12 | 112 | 81  | 27 | 29 |
| Q97S34 | 4.73 | Phenylalanine-tRNA ligase $\beta$ subunit                  | 44.44 | 37.45 | 60  | 36  | 27 | 22 |
| Q97QX6 | 5.69 | Phosphoenolpyruvate carboxylase                            | 39.42 | 41.65 | 46  | 49  | 27 | 30 |
| P65607 | 5.39 | Ornithine carbamoyltransferase, catabolic                  | 73.08 | 60.65 | 321 | 54  | 26 | 20 |
| Q97T39 | 4.91 | Pneumococcal surface protein A                             | 47.45 | 43.01 | 117 | 56  | 26 | 22 |
| P35594 | 5.69 | ATP-dependent Clp protease ATP-binding subunit ClpE        | 38.96 | 33.38 | 44  | 30  | 26 | 20 |
| Q97S28 | 5.10 | Polyribonucleotide nucleotidyltransferase                  | 38.53 | 41.52 | 87  | 62  | 26 | 26 |
| P0A3B7 | 4.93 | Elongation factor Ts                                       | 84.39 | 86.71 | 222 | 175 | 25 | 25 |
| Q97N43 | 5.34 | Inosine-5'-monophosphate dehydrogenase                     | 65.24 | 68.09 | 80  | 44  | 25 | 25 |
| Q97NL1 | 5.47 | Glyceraldehyde 3-phosphate dehydrogenase                   | 89.25 | 94.03 | 417 | 469 | 24 | 31 |
| Q97NH4 | 5.45 | Alcohol dehydrogenase, zinc-containing                     | 86.93 | 89.20 | 92  | 78  | 24 | 25 |
| I6L8U5 | 5.67 | 3-oxoacyl-[acyl-carrier-protein] synthase 2                | 81.02 | 73.48 | 82  | 50  | 24 | 20 |
| Q97SI6 | 5.06 | 6-phosphogluconate dehydrogenase, decarboxylating          | 73.21 | 72.78 | 119 | 149 | 24 | 30 |
| Q97N41 | 4.84 | ABC transporter, ATP-binding protein                       | 58.70 | 60.37 | 57  | 47  | 24 | 25 |
| Q97PI4 | 5.40 | Threonine-tRNA ligase                                      | 52.55 | 41.89 | 71  | 42  | 24 | 17 |
| Q97RV5 | 4.91 | Elongation factor Tu family protein                        | 49.27 | 45.02 | 87  | 79  | 24 | 26 |
| Q97SG9 | 4.50 | Trigger factor                                             | 62.30 | 64.17 | 111 | 109 | 23 | 26 |
| Q97SE7 | 5.29 | Aspartyl/glutamyl-tRNA(Asn/Gln) amidotransferase subunit B | 54.17 | 44.79 | 43  | 38  | 23 | 21 |

|        |      |                                                        |       |       |     |     |    |    |
|--------|------|--------------------------------------------------------|-------|-------|-----|-----|----|----|
| Q97PR0 | 5.06 | Asparagine-tRNA ligase                                 | 46.98 | 45.41 | 66  | 48  | 23 | 22 |
| Q97PK2 | 4.93 | UDP-glucose 4-epimerase                                | 85.55 | 86.73 | 87  | 68  | 22 | 23 |
| Q97RS8 | 6.16 | Lactate oxidase                                        | 83.33 | 84.92 | 167 | 101 | 22 | 25 |
| Q97T85 | 5.02 | Sugar isomerase domain protein AgaS                    | 70.62 | 28.09 | 56  | 9   | 22 | 8  |
| Q97QB4 | 5.47 | Glutamate dehydrogenase                                | 59.38 | 62.05 | 119 | 98  | 22 | 27 |
| Q97RS9 | 5.49 | Lysine-tRNA ligase                                     | 46.98 | 41.53 | 50  | 44  | 22 | 22 |
| Q97P40 | 4.69 | Putative general stress protein 24                     | 92.57 | 92.57 | 484 | 119 | 21 | 20 |
| P66565 | 10.2 | 30S ribosomal protein S4                               | 84.73 | 88.18 | 90  | 77  | 21 | 24 |
| Q97SP1 | 5.06 | Alcohol dehydrogenase, zinc-containing                 | 84.66 | 76.70 | 111 | 70  | 21 | 22 |
| P0A3M9 | 5.22 | L-lactate dehydrogenase                                | 75.91 | 77.74 | 108 | 153 | 21 | 25 |
| Q97QL3 | 4.92 | Tagatose 1,6-diphosphate aldolase                      | 69.94 | 60.12 | 93  | 38  | 21 | 18 |
| Q97PL8 | 5.00 | Oxidoreductase, pyridine nucleotide-disulfide, class I | 64.84 | 50.46 | 69  | 31  | 21 | 16 |
| P63413 | 5.24 | Acetate kinase                                         | 63.64 | 63.64 | 55  | 46  | 21 | 21 |
| I6L8V0 | 5.43 | Capsular polysaccharide biosynthesis protein Cps4J     | 64.96 | 69.23 | 70  | 64  | 21 | 27 |
| Q97PX1 | 5.12 | NADH oxidase                                           | 54.03 | 60.78 | 146 | 108 | 21 | 23 |
| Q97S86 | 5.05 | Glutamine synthetase, type I                           | 48.66 | 63.62 | 64  | 76  | 21 | 31 |
| Q97R16 | 5.29 | Serine hydroxymethyltransferase                        | 54.31 | 61.24 | 43  | 47  | 21 | 23 |
| Q97T35 | 5.90 | Metallo- $\beta$ -lactamase superfamily protein        | 49.19 | 39.53 | 41  | 30  | 21 | 18 |
| Q97R51 | 5.12 | Foldase protein PrsA                                   | 75.08 | 75.40 | 67  | 55  | 20 | 24 |
| Q97NM1 | 5.66 | Catabolite control protein A                           | 79.76 | 72.62 | 57  | 35  | 20 | 17 |
| Q97RI6 | 5.20 | Phosphopentomutase                                     | 72.70 | 54.34 | 54  | 27  | 20 | 16 |
| Q97SG0 | 5.08 | Serine-tRNA ligase                                     | 67.22 | 53.30 | 51  | 38  | 20 | 17 |
| Q97SE6 | 5.02 | Glutamyl-tRNA(Gln) amidotransferase subunit A          | 64.96 | 62.09 | 59  | 58  | 20 | 21 |
| Q97SF8 | 6.15 | Aspartokinase                                          | 64.54 | 59.91 | 46  | 39  | 20 | 20 |
| Q97PF9 | 4.81 | Cell division protein FtsZ                             | 56.56 | 57.28 | 63  | 52  | 20 | 22 |
| O54537 | 5.66 | Glucose-6-phosphate 1-dehydrogenase                    | 57.78 | 50.30 | 34  | 31  | 20 | 19 |
| Q97PW8 | 5.20 | Putative oxidoreductase                                | 62.56 | 45.65 | 61  | 28  | 20 | 14 |
| Q97QD2 | 8.07 | Signal recognition particle protein                    | 54.30 | 52.39 | 45  | 34  | 20 | 19 |
| Q97RB6 | 5.78 | Putative transcriptional regulator                     | 34.27 | 14.39 | 27  | 12  | 20 | 10 |

|        |      |                                              |       |       |     |     |    |    |
|--------|------|----------------------------------------------|-------|-------|-----|-----|----|----|
| Q97QT1 | 5.35 | Putative pullulanase                         | 31.88 | 27.14 | 47  | 24  | 20 | 15 |
| Q97N56 | 5.26 | 30S ribosomal protein S2                     | 68.34 | 71.04 | 121 | 143 | 19 | 22 |
| Q97S02 | 4.94 | Dipeptidase                                  | 53.65 | 65.45 | 55  | 58  | 19 | 23 |
| Q97NG0 | 5.14 | Glucose-6-phosphate isomerase                | 56.35 | 52.34 | 108 | 83  | 19 | 17 |
| Q97SP8 | 4.92 | Aminopeptidase PepS                          | 56.17 | 55.21 | 75  | 52  | 19 | 19 |
| I6L8U0 | 6.18 | UDP- <i>N</i> -acetylglucosamine 2-epimerase | 51.02 | 42.64 | 65  | 42  | 19 | 16 |
| Q97S60 | 4.97 | N utilization substance protein A            | 48.68 | 42.06 | 43  | 41  | 19 | 17 |

<sup>a</sup> Protein accession number.

<sup>b</sup> Calculated isoelectric point.

<sup>c</sup> Percent of the protein sequence covered by identified peptides.

<sup>d</sup> Total number of identified peptide sequences (peptide spectrum matches) for the protein.

<sup>e</sup> Number of unique peptide sequences.

**Table S4.** Top 100 hits of proteins identified in *S. pneumoniae* TIGR4 versus  $\Delta secA2$  mutant (shaded grey) culture supernatant extracts. TIGR4 peptides are sorted highest to lowest number of unique peptide sequences.

| Acc. <sup>a</sup> | pI <sup>b</sup> | Description                                      | % Coverage <sup>c</sup> |                | PSM <sup>d</sup> |                | Peptides <sup>e</sup> |                |
|-------------------|-----------------|--------------------------------------------------|-------------------------|----------------|------------------|----------------|-----------------------|----------------|
|                   |                 |                                                  | WT                      | $\Delta secA2$ | WT               | $\Delta secA2$ | WT                    | $\Delta secA2$ |
| Q9L7Q2            | 5.25            | Zinc metalloprotease ZmpB                        | 57.71                   | 40.40          | 197              | 133            | 84                    | 59             |
| Q97RY6            | 6.34            | Serine protease, subtilase family PrtA           | 38.32                   | 19.07          | 146              | 61             | 71                    | 35             |
| Q97NK0            | 6.61            | Alcohol dehydrogenase, iron-containing           | 54.47                   | 58.55          | 130              | 125            | 44                    | 49             |
| Q97QS2            | 4.81            | Enolase (Eno)                                    | 91.01                   | 67.97          | 212              | 139            | 36                    | 34             |
| Q97T80            | 5.57            | Zinc metalloprotease ZmpC                        | 30.66                   | 11.69          | 60               | 21             | 35                    | 15             |
| Q54970            | 5.17            | Pyruvate oxidase                                 | 63.11                   | 62.61          | 130              | 125            | 35                    | 45             |
| Q54869            | 5.15            | Arginine-tRNA ligase                             | 62.88                   | 51.15          | 67               | 56             | 33                    | 26             |
| Q97SC6            | 5.25            | Formate acetyltransferase                        | 52.97                   | 43.15          | 80               | 49             | 33                    | 29             |
| P64022            | 4.96            | Elongation factor G                              | 60.32                   | 76.05          | 86               | 102            | 33                    | 46             |
| P95829            | 4.77            | Chaperone protein DnaK                           | 64.91                   | 64.25          | 75               | 104            | 31                    | 38             |
| Q97RK7            | 4.93            | Aminopeptidase N                                 | 44.22                   | 35.38          | 57               | 35             | 30                    | 21             |
| Q97S89            | 4.98            | Phosphoglycerate kinase                          | 80.15                   | 84.67          | 162              | 84             | 29                    | 29             |
| P64030            | 4.97            | Elongation factor Tu (EF-Tu)                     | 66.08                   | 61.06          | 142              | 128            | 28                    | 30             |
| Q97QM4            | 5.48            | Ribonucleoside-diphosphate reductase             | 46.31                   | 25.31          | 40               | 24             | 26                    | 14             |
| Q97PH0            | 4.83            | Endopeptidase O                                  | 55.40                   | 41.11          | 50               | 46             | 26                    | 22             |
| P66565            | 10.15           | 30S ribosomal protein S4                         | 90.64                   | 93.60          | 100              | 73             | 26                    | 30             |
| Q97N55            | 6.07            | Secreted 45 kd protein                           | 84.69                   | 81.63          | 73               | 88             | 26                    | 32             |
| P18791            | 5.06            | Oligopeptide-binding protein AmiA                | 61.15                   | 42.49          | 62               | 55             | 25                    | 23             |
| Q97NL1            | 5.47            | Glyceraldehyde 3-phosphate dehydrogenase (GAPDH) | 90.15                   | 83.28          | 130              | 120            | 25                    | 28             |
| Q97RC5            | 5.15            | Pyruvate kinase (PK)                             | 54.29                   | 55.29          | 61               | 59             | 25                    | 28             |
| Q97RF9            | 5.14            | Ribosomal protein S1                             | 61.50                   | 68.00          | 67               | 75             | 25                    | 33             |
| Q97NB5            | 7.14            | Choline binding protein PcpA                     | 43.16                   | 18.04          | 46               | 16             | 24                    | 9              |
| Q97T93            | 5.36            | Adenylosuccinate lyase                           | 59.03                   | 44.21          | 36               | 28             | 24                    | 15             |
| P65887            | 5.69            | Adenylosuccinate synthetase                      | 57.01                   | 50.23          | 55               | 37             | 24                    | 21             |
| Q97NQ8            | 7.03            | DNA-directed RNA polymerase subunit $\beta$      | 23.84                   | 20.73          | 34               | 30             | 24                    | 22             |

|        |      |                                                             |       |       |     |    |    |    |
|--------|------|-------------------------------------------------------------|-------|-------|-----|----|----|----|
| Q97NQ7 | 5.14 | DNA-directed RNA polymerase subunit $\beta$                 | 26.52 | 23.28 | 44  | 35 | 24 | 24 |
| Q97NA4 | 5.08 | Arginine deiminase                                          | 49.88 | 30.32 | 60  | 16 | 23 | 11 |
| Q97P40 | 4.69 | Putative general stress protein 24                          | 93.56 | 64.85 | 106 | 37 | 23 | 17 |
| Q97SI6 | 5.06 | 6-phosphogluconate dehydrogenase                            | 59.49 | 53.38 | 59  | 57 | 23 | 24 |
| Q97SQ9 | 5.15 | Glucosamine-fructose-6-phosphate aminotransferase           | 53.99 | 51.50 | 49  | 43 | 23 | 25 |
| Q97N56 | 5.26 | 30S ribosomal protein S2                                    | 71.04 | 76.45 | 98  | 76 | 23 | 28 |
| P0A335 | 4.84 | 60 kDa chaperonin                                           | 42.41 | 56.30 | 45  | 56 | 23 | 30 |
| Q2MGH6 | 6.07 | Endo- $\alpha$ -N-acetylgalactosaminidase                   | 19.07 | 7.36  | 34  | 13 | 22 | 8  |
| Q97N37 | 6.96 | Serine protease                                             | 71.76 | 53.44 | 48  | 23 | 22 | 14 |
| I6L8V0 | 5.43 | Capsular polysaccharide biosynthesis protein Cps4J          | 63.25 | 57.26 | 42  | 28 | 22 | 21 |
| Q97Q36 | 4.81 | Putative phosphate transport system regulatory protein PhoU | 87.10 | 54.84 | 75  | 19 | 21 | 10 |
| Q97RH0 | 5.52 | Lipoprotein                                                 | 65.43 | 44.29 | 51  | 21 | 21 | 11 |
| P0A4G2 | 5.43 | Manganese ABC transporter substrate-binding lipoprotein     | 68.93 | 69.90 | 63  | 51 | 21 | 17 |
| Q97NE3 | 5.67 | Tyrosine-tRNA ligase                                        | 59.09 | 54.31 | 48  | 39 | 21 | 17 |
| P65607 | 5.39 | Ornithine carbamoyltransferase, catabolic                   | 65.68 | 75.44 | 74  | 45 | 21 | 23 |
| Q97R51 | 5.12 | Foldase protein PrsA                                        | 74.12 | 62.62 | 49  | 34 | 20 | 16 |
| P0A3Y3 | 5.31 | 2,3-bisphosphoglycerate-dependent phosphoglycerate mutase   | 75.22 | 68.26 | 73  | 49 | 20 | 18 |
| Q97SV1 | 9.06 | 50S ribosomal protein L5                                    | 88.89 | 88.89 | 112 | 68 | 20 | 18 |
| I6L8U5 | 5.67 | 3-oxoacyl-[acyl-carrier-protein] synthase 2                 | 67.88 | 65.45 | 46  | 34 | 20 | 19 |
| P0A3B7 | 4.93 | Elongation factor Ts                                        | 73.41 | 50.58 | 120 | 63 | 20 | 21 |
| P59213 | 5.22 | Maltose/maltodextrin-binding protein                        | 58.39 | 53.90 | 48  | 44 | 20 | 24 |
| Q97SG9 | 4.50 | Trigger factor                                              | 46.60 | 69.79 | 51  | 77 | 20 | 29 |
| Q2MGF6 | 6.93 | Lysozyme                                                    | 38.16 | 19.59 | 31  | 12 | 19 | 9  |
| Q97SJ2 | 5.50 | Capsular polysaccharide biosynthesis protein Cps4K          | 47.43 | 38.88 | 43  | 28 | 19 | 16 |
| P66050 | 5.12 | 50S ribosomal protein L10                                   | 87.35 | 77.71 | 149 | 52 | 19 | 18 |
| Q97PU5 | 4.82 | Phosphoglucomutase                                          | 47.55 | 47.03 | 43  | 41 | 19 | 21 |



|        |       |                                                          |       |       |     |    |    |    |
|--------|-------|----------------------------------------------------------|-------|-------|-----|----|----|----|
| P0A4S1 | 5.10  | Fructose-bisphosphate aldolase                           | 65.19 | 75.77 | 150 | 88 | 19 | 23 |
| Q97PF9 | 4.81  | Cell division protein FtsZ                               | 45.58 | 47.49 | 35  | 55 | 19 | 23 |
| Q97S45 | 5.17  | Valine-tRNA ligase                                       | 26.50 | 13.93 | 30  | 15 | 18 | 8  |
| Q97NG0 | 5.14  | Glucose-6-phosphate isomerase                            | 52.12 | 39.42 | 45  | 23 | 18 | 12 |
| Q97SP1 | 5.06  | Alcohol dehydrogenase                                    | 63.72 | 57.23 | 48  | 39 | 18 | 15 |
| Q97T12 | 5.26  | ABC transporter                                          | 72.10 | 68.48 | 46  | 36 | 18 | 16 |
| P66581 | 9.52  | 30S ribosomal protein S5                                 | 84.15 | 84.15 | 90  | 67 | 18 | 18 |
| Q97RS8 | 6.16  | Lactate oxidase                                          | 68.78 | 68.78 | 55  | 44 | 18 | 20 |
| Q97SP2 | 5.29  | PTS system, mannose-specific IIA <sub>B</sub> components | 61.45 | 58.43 | 50  | 49 | 18 | 23 |
| Q97QB4 | 5.47  | Glutamate dehydrogenase                                  | 49.33 | 45.54 | 40  | 49 | 18 | 26 |
| P29849 | 5.17  | Maltodextrin phosphorylase                               | 31.25 | 25.00 | 29  | 18 | 17 | 11 |
| Q97PX1 | 5.12  | NADH oxidase                                             | 48.80 | 19.17 | 39  | 18 | 17 | 11 |
| Q97QE7 | 4.86  | Choline kinase                                           | 60.31 | 40.46 | 32  | 22 | 17 | 13 |
| Q97SU7 | 9.52  | 50S ribosomal protein L6                                 | 80.34 | 83.15 | 50  | 31 | 17 | 15 |
| Q97NH4 | 5.45  | Alcohol dehydrogenase, zinc-containing                   | 61.08 | 50.00 | 40  | 32 | 17 | 15 |
| P35592 | 5.16  | Oligopeptide-binding protein AliA                        | 36.36 | 32.73 | 28  | 28 | 17 | 17 |
| Q97SN5 | 9.95  | 50S ribosomal protein L13                                | 89.86 | 91.89 | 62  | 75 | 17 | 19 |
| P67580 | 4.98  | Methionine-tRNA ligase                                   | 32.93 | 35.04 | 30  | 43 | 17 | 21 |
| Q97QL3 | 4.92  | Tagatose 1,6-diphosphate aldolase                        | 58.59 | 29.45 | 27  | 12 | 16 | 8  |
| Q97RS9 | 5.49  | Lysine-tRNA ligase                                       | 29.64 | 21.77 | 31  | 21 | 16 | 9  |
| Q97R16 | 5.29  | Serine hydroxymethyltransferase                          | 43.78 | 33.01 | 26  | 15 | 16 | 11 |
| Q97Q48 | 5.15  | Alanine-tRNA ligase                                      | 23.17 | 16.40 | 25  | 16 | 16 | 11 |
| P64297 | 5.08  | GMP synthase                                             | 36.92 | 32.31 | 26  | 24 | 16 | 12 |
| Q97S02 | 4.94  | Dipeptidase                                              | 35.41 | 30.04 | 25  | 22 | 16 | 12 |
| P22976 | 5.22  | Probable transketolase                                   | 40.58 | 39.97 | 38  | 31 | 16 | 17 |
| P0A4C3 | 9.70  | 30S ribosomal protein S3                                 | 68.20 | 71.89 | 59  | 46 | 16 | 19 |
| Q97SV2 | 10.68 | 50S ribosomal protein L2                                 | 62.09 | 72.20 | 51  | 74 | 16 | 24 |
| Q97T85 | 5.02  | Sugar isomerase domain protein AgaS                      | 44.85 | 19.07 | 20  | 5  | 15 | 5  |
| Q97NQ0 | 5.16  | Aspartate-ammonia ligase                                 | 65.15 | 40.91 | 28  | 12 | 15 | 8  |
| Q97PM1 | 5.99  | GTP-sensing transcriptional pleiotropic repressor CodY   | 56.49 | 35.88 | 36  | 16 | 15 | 9  |

|        |      |                                                              |       |       |    |    |    |    |
|--------|------|--------------------------------------------------------------|-------|-------|----|----|----|----|
| Q97PK2 | 4.93 | UDP-glucose 4-epimerase                                      | 67.26 | 34.22 | 34 | 16 | 15 | 9  |
| Q97PN2 | 4.74 | Non-heme iron-containing ferritin                            | 87.64 | 51.69 | 62 | 22 | 15 | 9  |
| Q97R14 | 5.64 | Putative uncharacterized protein                             | 50.00 | 38.89 | 31 | 18 | 15 | 10 |
| Q97R09 | 5.54 | Iron-compound ABC transporter, iron compound-binding protein | 62.17 | 44.87 | 33 | 20 | 15 | 10 |
| Q97T11 | 5.63 | Lipoprotein                                                  | 57.75 | 50.35 | 27 | 16 | 15 | 11 |
| Q97SP5 | 5.21 | Aminopeptidase C                                             | 41.67 | 29.28 | 31 | 18 | 15 | 11 |
| Q97T39 | 4.91 | Pneumococcal surface protein A                               | 28.49 | 15.59 | 28 | 19 | 15 | 11 |
| Q97RI6 | 5.20 | Phosphopentomutase                                           | 51.61 | 50.62 | 32 | 27 | 15 | 13 |
| Q97NG1 | 5.00 | Glutamate-tRNA ligase                                        | 32.30 | 35.19 | 22 | 23 | 15 | 14 |
| P66708 | 4.75 | DNA-directed RNA polymerase subunit $\alpha$                 | 48.55 | 43.41 | 30 | 23 | 15 | 15 |
| Q97N43 | 5.34 | Inosine-5'-monophosphate dehydrogenase                       | 46.54 | 38.41 | 24 | 24 | 15 | 15 |
| Q97QM7 | 4.72 | Phosphoenolpyruvate-protein phosphotransferase               | 35.70 | 31.89 | 42 | 46 | 15 | 20 |
| Q97QP6 | 8.81 | Ribosome biogenesis GTPase A                                 | 47.35 | 12.72 | 22 | 7  | 14 | 5  |
| Q97PW6 | 5.00 | Glycine-tRNA ligase $\beta$ subunit                          | 21.68 | 12.83 | 24 | 11 | 14 | 7  |
| Q97S60 | 4.97 | N utilization substance protein A                            | 39.42 | 24.07 | 19 | 11 | 14 | 7  |
| Q97PQ7 | 6.20 | Conserved domain protein                                     | 70.33 | 63.16 | 34 | 18 | 14 | 10 |
| Q97SU1 | 5.10 | Adenylate kinase                                             | 75.00 | 68.87 | 34 | 29 | 14 | 11 |
| Q97PD6 | 5.55 | Protein translocase subunit SecA 1                           | 21.15 | 15.89 | 17 | 14 | 14 | 11 |
| Q97T63 | 5.66 | ABC transporter, substrate-binding protein                   | 33.81 | 28.31 | 23 | 20 | 14 | 11 |

<sup>a</sup> Protein accession number.

<sup>b</sup> Calculated isoelectric point.

<sup>c</sup> Percent of the protein sequence covered by identified peptides.

<sup>d</sup> Total number of identified peptide sequences (peptide spectrum matches) for the protein.

<sup>e</sup> Number of unique peptide sequences.

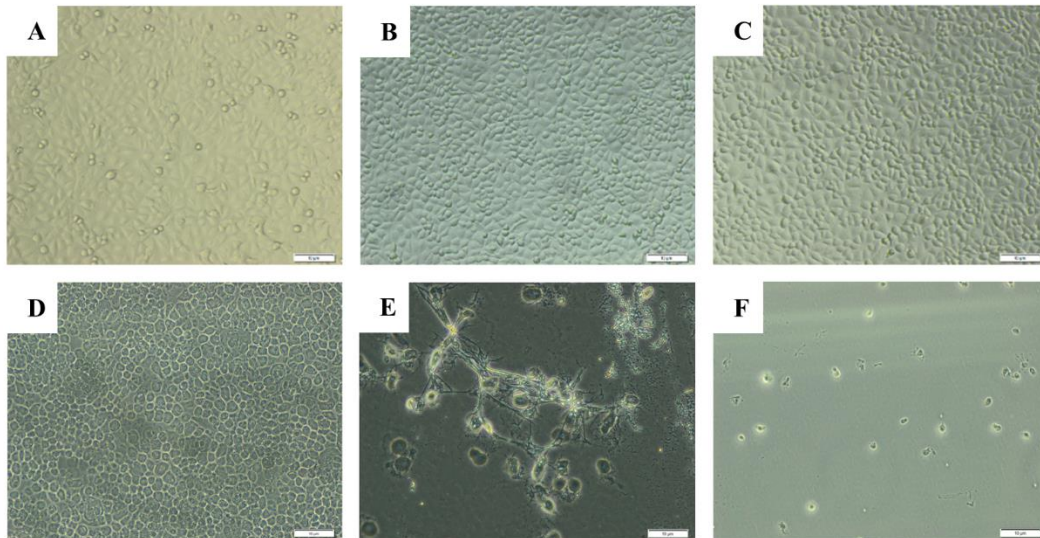

**Fig. S1. A549 epithelial cells during the A549 association assay.** Images of A549 cells during the association assay were taken on an inverted microscope to monitor the state of the epithelial layer at each stage of the assay. (A) Confluent layer of A549 cells with a density of  $2 \times 10^5$  cells. A549 cells were infected with (B) and without bacteria (C) with an incubation period of 2 h. (D) A549 cells and bacteria were treated with cold dH<sub>2</sub>O for 20 min to detach A549 cells. This step was repeated for a further 20 min (E + F) to ensure majority of A549 cells were detached. Scale bar = 10  $\mu$ m.

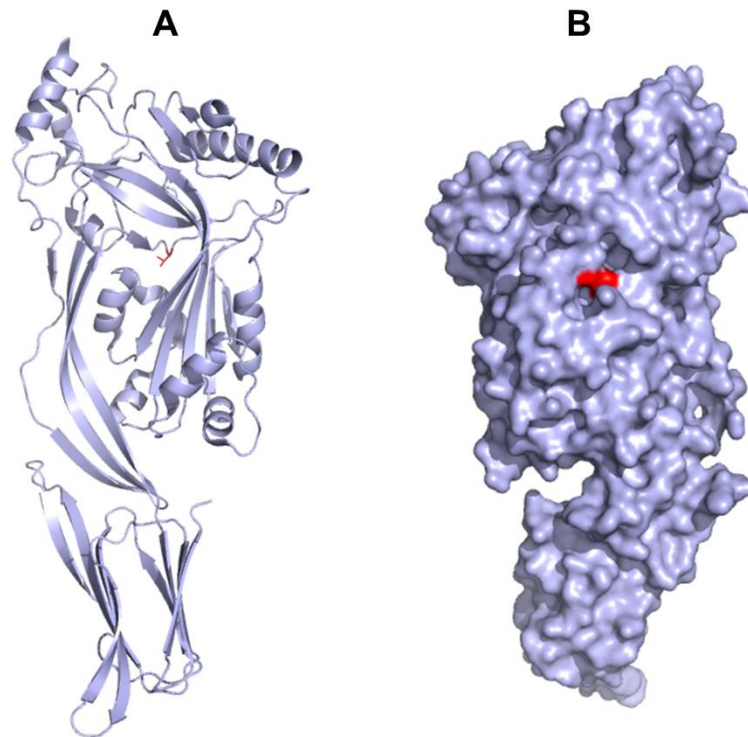

**Fig. S2. Three dimensional models of pneumolysin protein structure.** Ribbon (A) and surface (B) representations of pneumolysin were manipulated on PyMOL. The crystal structure of pneumolysin from *Streptococcus pneumoniae* D39 (PDB code: 5CR6) was used as a template. The position of residue 63, a threonine residue, is highlighted in red. This residue was replaced by alanine residue in Ply63.

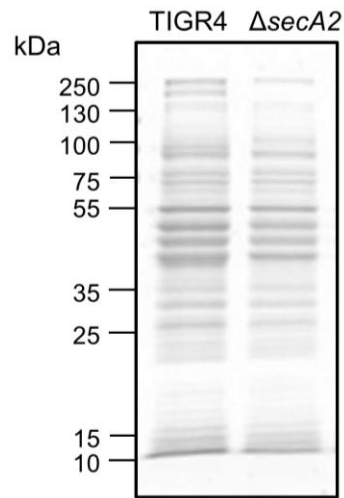

**Fig. S3. SDS-PAGE profiles of cell wall protein (CWP) fractions.** *S. pneumoniae* TIGR4 wild type and  $\Delta secA2$  mutant cells were incubated with mutanolysin in osmotically-supported medium to release cell wall-associated proteins. These were separated by electrophoresis, and stained with Coomassie (as shown). Samples were also subjected to brief SDS-PAGE, in-gel tryptic digestion and peptides analyzed by LC-MS/MS.
